# Supplementary material
Source: MDPI journal article supplement (https://www.mdpi.com/2073-4441/9/12/941)
Supplement: s1 [file s1]

Name:

Survey ID:

Date:

Time:

Place:

## Questionnaire Sample

### How to Cope with Sea Level Rise?

Observation data have shown that sea level has been rising steadily over the last centuries and will continue to rise. Furthermore, our research teams are modeling the 2090 to 2099 sea-level scenarios of three coastal cities, Corpus Christi TX, Gulfport MS, and Panama City FL. The results show that there would be a 1.94-foot increase in sea level. For instance, 6650 acres of existing land in Bay County, FL would be permanently inundated. Of these, 632 acres of land are residential areas. You will be asked for some personal information, which will be treated confidentially. All responses will be anonymous. Your names, emails and IP addresses will not be recorded or connected to your responses. This survey should take you about 10–15 min. Your contribution to this study is greatly appreciated. Your answers would be helpful to our research about how to cope with future sea level rise.

1. To what degree do you agree with that the fact sea-level rise is occurring?  
☐ Strongly agree   ☐ Agree   ☐ Neither agree nor disagree   ☐ Disagree   ☐ Strongly disagree
2. Do you believe that sea level rise intensifies extreme weather events, e.g., floods, hurricane and storm surge, etc.??  
☐ Yes   ☐ No
3. To what degree do you consider sea level rise as a threat to our future natural environment?  
☐ Very serious   ☐ Serious   ☐ Somewhat serious   ☐ Not very serious   ☐ Not at all
4. To what degree do you consider sea level rise as a threat to our built environment?  
☐ Very serious   ☐ Serious   ☐ Somewhat serious   ☐ Not very serious   ☐ Not at all
5. Have you experienced any damage due to the following extreme weather events? (please check all that apply—yes or no options for each type)  
☐ Flooding   ☐ Extreme precipitation   ☐ Hurricane   ☐ Other disasters
6. If your primary residences are in or adjacent to the vulnerable coastal areas which are pretty likely to be inundated owing to sea level rise, how likely would you move?  
☐ Not relocate   ☐ Not sure   ☐ Will relocate
7. To what extent each of the following factors can affect your decision to move or not. Please rank the following factors.

| Key Factors                                                         | Not at all Important | Unimportant | Neither Important nor Unimportant | Important | Very Important |
|---------------------------------------------------------------------|----------------------|-------------|-----------------------------------|-----------|----------------|
|                                                                     | 1                    | 2           | 3                                 | 4         | 5              |
| Job opportunities of new communities                                |                      |             |                                   |           |                |
| Distance to current work places                                     |                      |             |                                   |           |                |
| Distance to current home residence                                  |                      |             |                                   |           |                |
| Infrastructure quality of new communities                           |                      |             |                                   |           |                |
| School quality of new communities                                   |                      |             |                                   |           |                |
| Health care services of new communities                             |                      |             |                                   |           |                |
| Social and family ties of new communities                           |                      |             |                                   |           |                |
| Social activities within new communities                            |                      |             |                                   |           |                |
| Relocation costs                                                    |                      |             |                                   |           |                |
| Safety issues like crime rates                                      |                      |             |                                   |           |                |
| Current adaptive strategies seawalls, sand dunes and marshes...etc. |                      |             |                                   |           |                |
| Cost of damage to existing homes                                    |                      |             |                                   |           |                |
| Flooding insurance policies of existing community                   |                      |             |                                   |           |                |
| The value of your existing properties                               |                      |             |                                   |           |                |
| Others, please specify:                                             |                      |             |                                   |           |                |

8. If you decide **NOT** to move, what are the major reasons (Please select the top three reasons)

- A. You do not believe that Inundation would happen.
  - B. It is hard for me to get used to a brand new environment in terms of life and work.
  - C. It is difficult to find a job at another place.
  - D. Current adaptive strategies, such as shoreline protection, are capable of combating sea level rise.
  - E. Family and social ties impact my decision.
  - F. The relocation costs are too high.
  - G. Others, please specify:
9. Please rate the preference of the following places where you would move if you decide to move? (1 least preferred, 5 most preferred)

|                                                  | Least Preferred |   |   | Most Preferred |   |
|--------------------------------------------------|-----------------|---|---|----------------|---|
| Move inland but in the same city                 | 1               | 2 | 3 | 4              | 5 |
| Move out of the city but in the same county      | 1               | 2 | 3 | 4              | 5 |
| Move out of the county but within the same state | 1               | 2 | 3 | 4              | 5 |
| Move into an adjacent state                      | 1               | 2 | 3 | 4              | 5 |
| Move into a non-contiguous state                 | 1               | 2 | 3 | 4              | 5 |
| Elevate existing house                           | 1               | 2 | 3 | 4              | 5 |
| Do nothing                                       | 1               | 2 | 3 | 4              | 5 |

10. Under what conditions would you consider moving?
- A. Inundation would happen.
  - B. Find a job at another place.
  - C. Inefficiency of current adaptive strategies, such as shoreline protection, to combat sea level rise.
  - D. Your family, relatives, or neighbors decide to move.
  - E. The relocation costs are not high.
  - F. Your current property value will be affected.
  - G. You do not have insurance plan.
  - H. You feel unsafe in the area.
  - I. The public services (health, education....) are not efficient.
  - J. Others, please specify:
11. What should local communities and governments do to cope with inundation due to sea level rise from your perspective?

|                                                                                     | least Preferred |   |   | Most Preferred |   |
|-------------------------------------------------------------------------------------|-----------------|---|---|----------------|---|
| To purchase the land at risk                                                        | 1               | 2 | 3 | 4              | 5 |
| To discourage the development of land at risk                                       | 1               | 2 | 3 | 4              | 5 |
| To build the structural constructions along shorelines, like seawalls and bulkheads | 1               | 2 | 3 | 4              | 5 |
| To plan new communities in nearby cities to help relocate people who intend to move | 1               | 2 | 3 | 4              | 5 |
| To Build up marsh areas and non-structural- Shore nourishment                       | 1               | 2 | 3 | 4              | 5 |
| To elevate buildings/structures at risk                                             | 1               | 2 | 3 | 4              | 5 |
| To raise public funding to help communities prepare for sea level rise              | 1               | 2 | 3 | 4              | 5 |

12. What is your gender?
- ☐ Male    ☐ Female
13. Which age group are you in?
- ☐ less than 18    ☐ 18 to 25    ☐ 26–35    ☐ 36–45    ☐ 45–65    ☐ older than 65
14. What is your race?

☐ White    ☐ African American    ☐ Asian    ☐ Hispanic    ☐ Other: \_\_\_\_\_

15. Which one of the following best describes your employment status?

☐ Employed for wages    ☐ Self-employed    ☐ Out of work and looking for work

☐ A homemaker    ☐ Currently unemployed    ☐ Student    ☐ Retired

☐ Others, please specify \_\_\_\_\_

16. How many people in your household?

☐ 1            ☐ 2            ☐ 3            ☐ 4            ☐ 5 and above

17. What is the highest level of school you completed?

☐ High school or less

☐ High school graduate—high school diploma or the equivalent

☐ Two year college degree (AA, AS) or technical school

☐ Bachelor's degree

☐ Graduate degree (MA, MS, MBA, PhD, JD, MD, etc.)

18. What is the Zip Code of your current home residence?

Zip Code: \_\_\_\_\_

19. How many times have you moved in the last 10 years?

☐ 0    ☐ 1    ☐ 2    ☐ 3 and above

20. How far did you move in your most recent move?

☐ same city

☐ another city but in the same county

☐ another county but within the same state

☐ another state

☐ not applicable

21. Why did you move? (please select all that apply)

☐ Change job            ☐ Retirement            ☐ Go for warmer weather    ☐ Find a better school for kids

☐ Go to college            ☐ Find a bigger house    ☐ Find a smaller house            ☐ Others (please specify)

22. How long have you been living in your current primary residence?

☐ 2 years or less    ☐ 3 to 5 years    ☐ 6 to 10 years    ☐ More than 10 years

23. What is your house type?

☐ Apartment    ☐ Townhouse    ☐ Duplex house    ☐ Single family house    ☐ Movable dwelling

24. Do you rent or own the current house?

☐ Rent    ☐ Own

25. What is your monthly rent if you are currently renting?

☐ less than \$500    ☐ \$500 to \$999    ☐ \$1000 to \$1500    ☐ more than \$1500—not applicable

26. What is your housing value if you currently own the house?

☐ Less than \$50,000

☐ \$50,000 to \$99,999

☐ \$100,000 to \$199,999

☐ \$200,000 to \$299,999

☐ \$300,000 to \$500,000

☐ more than \$500,000—not applicable

27. What is your household annual income before tax in 2012

☐ Less than \$50,000

- ☐ \$50,000 to \$59,999
- ☐ \$60,000 or 69,999
- ☐ \$70,000 to \$79,999
- ☐ \$80,000 to \$89,999
- ☐ \$90,000 to \$99,999
- ☐ More than \$100,000

28. How far (miles) is your primary residence to nearest coast?

----- mile
